# Supplementary material
Source: publisher figshare collection journal article supplement (https://frontiersin.figshare.com/ndownloader/files/12168623)
Supplement: Supplementary file [file 12168623]

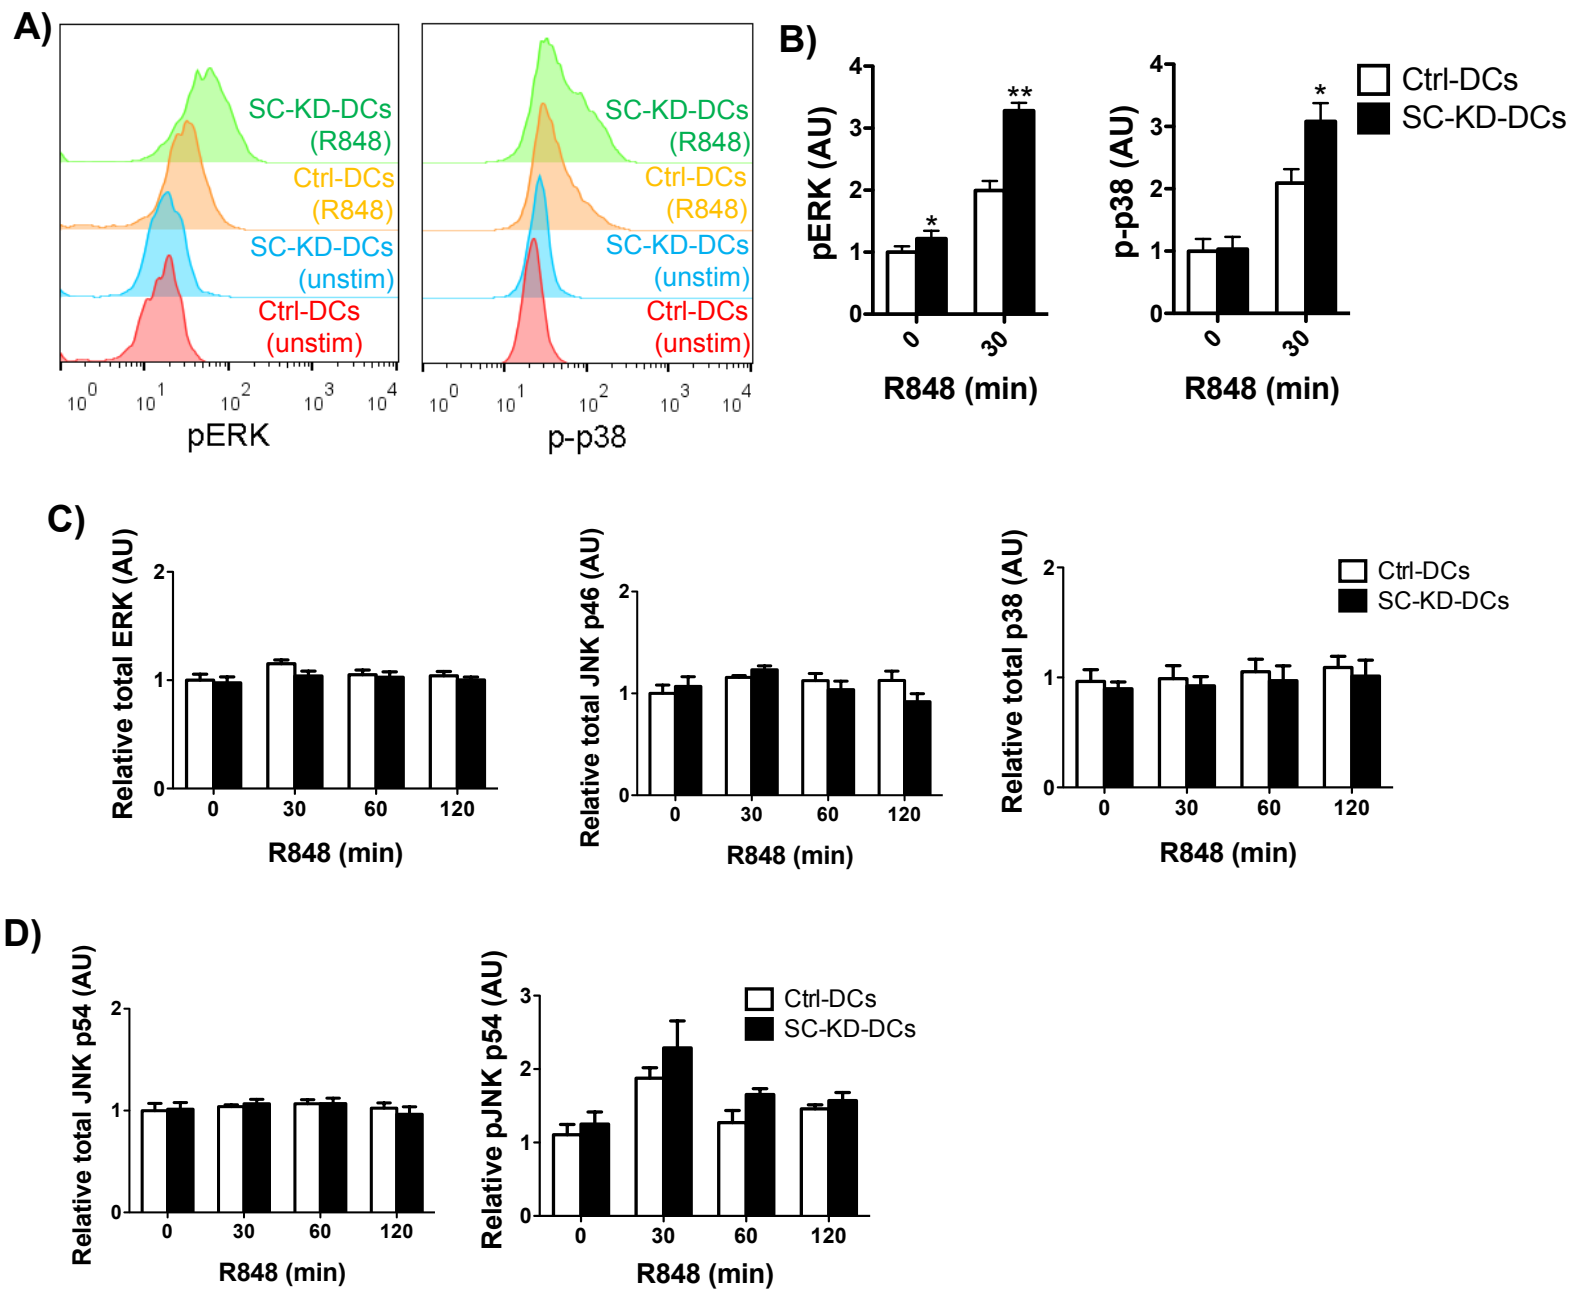

**Figure S2, related to Fig. 2: Phosphoflow and total protein/mRNA quantification.** Human monocyte-derived dendritic cells (moDCs) were treated with siRNA for DC-SCRIPT (SC-KD-DCs) or non-targeting siRNA as a control (Ctrl-DCs) during differentiation into DCs. (A-B) Ctrl-DCs and SC-KD-DCs were stimulated with R848 (TLR7/8 ligand) for 30 min, and assayed for phosphorylation of the 3 major MAPKs: ERK, JNK, and p38. The pJNK Ab did not work in FACS, and data are not displayed. (A) Representative FACS histograms of pERK and p-p38. (B) Quantification of relative mean fluorescent intensity ( $n = 5-8$ , mean  $\pm$  SEM). (C-D) Ctrl-DCs and SC-KD-DCs were stimulated with R848 for 0-120 min, and assayed for total expression of the 3 major MAPKs: ERK, JNK, and p38. JNK was divided into p46 and p54 isoforms. Phosphorylated p-p54 is also displayed.  $n = 5$ , mean  $\pm$  SEM. Statistics: student's paired two-tailed  $t$  test, \*  $p < 0.05$ . \*\*  $p < 0.01$ .
